# Supplementary material for: Antimicrobial resistance and genetic characterization of Shigella spp. in Shanxi Province, China, during 2006–2016
Source: PubMed Central journal article supplement (PMC6542020; doi:10.1186/s12866-019-1495-6), 2019-05-29
Supplement: 12866_2019_1495_MOESM1_ESM.pdf [file 12866_2019_1495_MOESM1_ESM.pdf]

**Table 1** Primers for the PCR detection of antimicrobial-resistance determinants used in this study.

| Target                                   | Primer sequence(5'-3')                                                   | Amplicon size(bp) | Reference |
|------------------------------------------|--------------------------------------------------------------------------|-------------------|-----------|
| <i>bla</i> <sub>CTX-M-1</sub> group      | F: GGTAAAAAATCACTGCGTC<br>R: TTACAAACCGTCGGTGACGA                        | 873               | (17)      |
| <i>bla</i> <sub>CTX-M-9</sub> group      | F: AGAGTGCAACGGATGATG<br>R: CCAGTTACAGCCCTTCGG                           | 868               | (17)      |
| <i>bla</i> <sub>CTX-M-2/8/25</sub> group | F: ACCGAGCCSACGCTCAA<br>R: CCGCTGCCGGTTTTATC                             | 221               | (17)      |
| <i>bla</i> <sub>TEM</sub>                | F: ATGAGTATTCAACATTTCCG<br>R: CCAATGCTTAATCAGTGAGG                       | 1080              | (21)      |
| <i>bla</i> <sub>OXA</sub>                | F: ATTAAGCCCTTTACCAAACCA<br>R: AAGGGTTGGGCGATTTTGCCA                     | 890               | (22)      |
| <i>bla</i> <sub>VIM</sub>                | F: AGTGGTGAGTATCCGACAG<br>R: ATGAAAGTGCGTGGAGAC                          | 509               | (24)      |
| <i>bla</i> <sub>CMY</sub>                | F: GTGGTGGATGCCAGCATCC<br>R: GGTCGAGCCGGTCTTGTTGAA                       | 915               | (21)      |
| <i>bla</i> <sub>SHV</sub>                | F: TTATCTCCCTGTTAGCCACC<br>R: GATTTGCTGATTCGCTCGG                        | 795               | (21)      |
| <i>Int11</i>                             | F: ACATGTGATGGCGACGCACGA<br>R: ATTTCTGTCTGGCTGGCGA                       | 569               | (20)      |
| <i>Int12</i>                             | F: CACGGATATGCGACAAAAAGGT<br>R: GTAGCAAACGAGTGACGAAATG                   | 789               | (20)      |
| Class 1 integron variable region         | hep58: TCATGGCTTGTTATGACTGT<br>hep59: GTAGGGCTTATTATGCACGC               | Variable          | (17)      |
| Class 2 integron variable region         | hep74: CGGGATCCCGGACGGCATGCACG<br>ATTTGTA<br>hep51: GATGCCATCGCAAGTACGAG | Variable          | (16)      |
| <i>gyrA</i>                              | F: TACACCGGTCAACATTGAGG                                                  | 648               | (25)      |

|                      |                                                          |     |      |
|----------------------|----------------------------------------------------------|-----|------|
|                      | R: TTAATGATTGCCGCCGTCGG                                  |     |      |
| <i>gyrB</i>          | F: TGAAATGACCCGCCGTAAAGG<br>R: GCTGTGATAACGCAGTTTGTCCGGG | 309 | (25) |
| <i>parC</i>          | F: GTACGTGATCATGGACCGTG<br>R: TTCGGCTGGTCGATTAATGC       | 531 | (25) |
| <i>parE</i>          | F: ATGCGTGCGGCTAAAAAAGTG<br>R: TCGTCGCTGTCAGGATCGATAC    | 290 | (25) |
| <i>qnrA</i>          | F: ATTTCTCACGCCAGGATTTG<br>R: GATCGGCAAAGGTYAGGTCA       | 516 | (26) |
| <i>qnrB</i>          | F: GATCGTGAAAGCCAGAAAGG<br>R: ACGAYGCCTGGTAGTTGTCC       | 469 | (26) |
| <i>qnrD</i>          | F: CGAGATCAATTTACGGGGAATA<br>R: AACAAAGCTGAAGCGCCTG      | 656 | (21) |
| <i>qnrS</i>          | F: ACGACATTCGTCAACTGCAA<br>R: TAAATTGGCACCCCTGTAGGC      | 417 | (26) |
| <i>aac(6')-Ib-cr</i> | F: GCAACGCAAAAACAAAGTTAGG<br>R: GTGTTTGAACCATGTACA       | 560 | (23) |

---
